# Supplementary material for: Emergence of a Hybrid IncI1-Iα Plasmid-Encoded blaCTX-M-101 Conferring Resistance to Cephalosporins in Salmonella enterica Serovar Enteritidis
Source: MDPI journal article supplement (doi:10.3390/microorganisms11051275), 2023-05-12
Supplement: s1 [file s1]

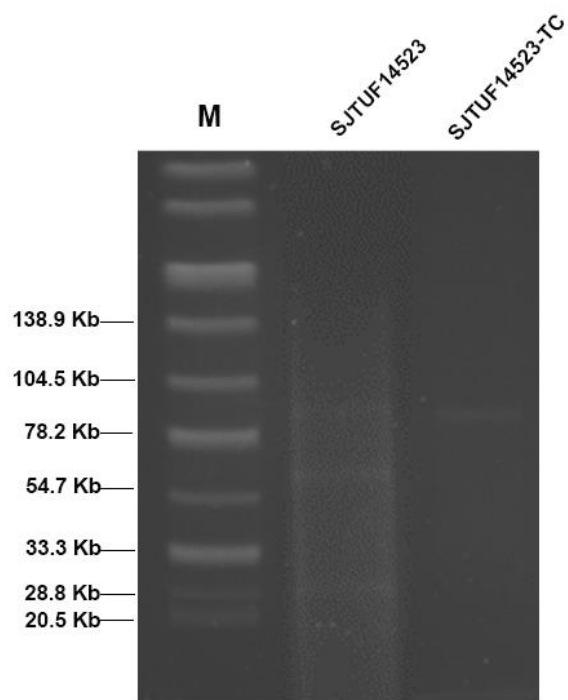

**Figure S2** Plasmid profiles of *S. Enteritidis* SJTUF14523 and its transconjugant (SJTUF14523-TC) determined by S1-PFGE. Lanes M, H9812 was used as molecular size marker with different bands labeled
