# Supplementary material for: Emergence of a Hybrid IncI1-Iα Plasmid-Encoded blaCTX-M-101 Conferring Resistance to Cephalosporins in Salmonella enterica Serovar Enteritidis
Source: MDPI journal article supplement (doi:10.3390/microorganisms11051275), 2023-05-12
Supplement: s1 [file s1]

Nucleotide sequence

| Species/Abbrv | *****                                                                                                                                                                     |
|---------------|---------------------------------------------------------------------------------------------------------------------------------------------------------------------------|
| 1. CTX-M-101  | C G A T T G C G G A A A A G C A C G T C A A T G G G A C A T G T C A C T G G C T G A C C T T A T C G C G G C G C G C T A C A G T A C A G C G A T A A C G T G C G A T G A A |
| 2. CTX-M-15   | C G A T T G C G G A A A A G C A C G T C A A T G G G A C A T G T C A C T G G C T G A C C T T A C G C G G C G C G C T A C A G T A C A G C G A T A A C G T G C G A T G A A   |

Amino acid sequence

| Species/Abbrv | K | S | E | S | P | N | L | L | N | R | V | E | I | K | S | D | L | V | N | Y | N | P | I | A | E | K | H | V | G | T | M | S | L | A | E | L | I | A | A | L | Y | S | D | N | V | A | M | N | K | L | I | A | H | V | G | C | P | A | S | V | A | F | A | R | Q | L | D | E | T | F | R | L | D | R | T | E | P | T | L |
|---------------|---|---|---|---|---|---|---|---|---|---|---|---|---|---|---|---|---|---|---|---|---|---|---|---|---|---|---|---|---|---|---|---|---|---|---|---|---|---|---|---|---|---|---|---|---|---|---|---|---|---|---|---|---|---|---|---|---|---|---|---|---|---|---|---|---|---|---|---|---|---|---|---|---|---|---|---|---|---|---|
| 1. CTX-M-101  | K | S | E | S | P | N | L | L | N | R | V | E | I | K | S | D | L | V | N | Y | N | P | I | A | E | K | H | V | G | T | M | S | L | A | E | L | I | A | A | L | Y | S | D | N | V | A | M | N | K | L | I | A | H | V | G | C | P | A | S | V | A | F | A | R | Q | L | D | E | T | F | R | L | D | R | T | E | P | T | L |
| 2. CTX-M-15   | K | S | E | S | P | N | L | L | N | R | V | E | I | K | S | D | L | V | N | Y | N | P | I | A | E | K | H | V | G | T | M | S | L | A | E | L | I | A | A | L | Y | S | D | N | V | A | M | N | K | L | I | A | H | V | G | C | P | A | S | V | A | F | A | R | Q | L | D | E | T | F | R | L | D | R | T | E | P | T | L |

**Figure S1** Nucleotide sequence (a) and amino acid sequence (b) comparison of *bla*<sub>CTX-M-101</sub> and *bla*<sub>CTX-M-15</sub>
