# Supplementary material for: Emergence of a Hybrid IncI1-Iα Plasmid-Encoded blaCTX-M-101 Conferring Resistance to Cephalosporins in Salmonella enterica Serovar Enteritidis
Source: MDPI journal article supplement (doi:10.3390/microorganisms11051275), 2023-05-12
Supplement: s1 [file s1]

**Table S1** Resistance genes and plasmids carried by *S. Enteritidis* SJTUF14253

|                      |                    | Plasmids                       |                             |                                          |
|----------------------|--------------------|--------------------------------|-----------------------------|------------------------------------------|
|                      |                    | p14253A                        | p14253B                     | p14253 C                                 |
| Size (bp)            | 4,679,991          | 85,862                         | 64,327                      | 24,486                                   |
| Replicon type        |                    | IncI1                          | IncFII-FIB                  | IncX1                                    |
| Resistance genes     |                    |                                |                             |                                          |
| Aminoglycosides      | <i>aac(6')-Iaa</i> |                                |                             | <i>aph(3'')-Ib</i> ,<br><i>aph(6)-Id</i> |
| β-lactams            |                    | <i>bla<sub>CTX-M-101</sub></i> | <i>bla<sub>TEM-1b</sub></i> | <i>bla<sub>TEM-1b</sub></i>              |
| Colistin             |                    |                                |                             |                                          |
| Quinolones           |                    |                                |                             |                                          |
| Fosfomycin           |                    |                                |                             |                                          |
| Sulphonamides        |                    |                                |                             | <i>sul2</i>                              |
| Trimethoprim         |                    |                                |                             |                                          |
| Phenicol             |                    |                                |                             |                                          |
| Rifampicin           |                    |                                |                             |                                          |
| Tetracyclines        |                    |                                |                             |                                          |
| Chromosomal mutation | <i>gyrAD87Y</i>    |                                |                             |                                          |
